# Supplementary material for: Severity of Illness Caused by Severe Acute Respiratory Syndrome Coronavirus 2 Variants of Concern in Children: A Single-Center Retrospective Cohort Study
Source: bioRxiv or medRxiv preprint supplement (doi:10.1101/2021.10.23.21265402), 2021-10-26
Supplement: Supplementary file [file media-1.pdf]

## Supplemental Methods

### *SARS-CoV-2 Whole Genome Sequencing*

#### Viral RNA Extraction

Viral RNA was extracted from clinical specimens utilizing the QIAamp 96 Virus QIAcube HT Kit (Qiagen, cat. no. 57731). Clinical testing for SARS-CoV-2 presence was performed by quantitative reverse transcription and PCR (qRT-PCR) with the CDC 2019-nCoV RT-PCR Diagnostic Panel utilizing the N1 probe in SARS-CoV-2 and RP probes for sample quality control as previously described (IDT, cat. no. 10006713). All specimens that failed to amplify the RP housekeeping gene were excluded from this study. All specimens with an N1 probe cycle threshold (Ct) less than or equal to 35 were considered positive and included in this study. RT-PCR was performed on all specimens to validate Ct values obtained by the clinical diagnostic laboratory. Ct values from the N1 probes were used in all subsequent analyses.

#### cDNA Synthesis and Viral Genome Amplification

cDNA synthesis was performed with SuperScript IV First Strand Synthesis Kit (ThermoFisher, cat. no. 18091050) using 11 µl of extracted viral nucleic acids and random hexamers according to manufacturer's specifications. Direct amplification of the viral genome cDNA was performed in multiplexed PCR reactions to generate ~400 bp amplicons tiled across the genome. The multiplex primer set, comprised of two non-overlapping primer pools, was created using Primal Scheme and provided by the Artic Network (version 3 and 4 releases). PCR amplification was carried out using Q5 Hot Start HF Taq Polymerase (NEB, cat. no. M0493L) with 5 µl of cDNA in a 25 µl reaction volume. A two-step PCR program was used with an initial step of 98 °C for 30 s, then 35 cycles of 98 °C for 15 s followed by five minutes at 64 °C. Separate reactions were carried out for each primer pool and validated by agarose gel electrophoresis alongside negative controls. Each reaction set included positive and negative amplification controls and was performed in a space physically separated for pre- and post-PCR processing steps to reduce contamination. Amplicon sets for each genome were pooled prior to sequencing library preparation.

#### Sequencing Library Preparation, Illumina Sequencing, and Genome Assembly

Sequencing library preparation of genome amplicon pools was performed using the SeqWell plexWell 384 kit per manufacturer's instructions. Pooled libraries of up to 96 genomes were sequenced on the Illumina MiSeq using the V2 500 cycle kit. Sequencing reads were trimmed to remove adapters and low-quality sequences using Trimmomatic v0.36. Trimmed reads were aligned to the reference genome sequence of SARS-CoV-2 (accession MN908947.3) using bwa v0.7.15. Pileups were generated from the alignment using samtools v1.9 and consensus sequence determined using iVar v1.2.2 with a minimum depth of 10, a minimum base quality score of 20, and a consensus frequency threshold of 0 (i.e. majority base as the consensus).<sup>1</sup> Consensus genome sequences were deposited in the GISAID public database (Table S1).

#### Bioinformatics Analyses

Genome sequences were aligned using MAFFT v7.453 software and manually edited using MEGA v6.06. We used the Pango classification scheme (<https://cov-lineages.org/>; PangoLearn version 9/28/2021) to identify the lineages that subsequently were grouped in variants using scorpio (scorpio v0.3.12). To confirm the clustering of the sequences by lineage, we inferred a Maximum Likelihood phylogeny with IQ-Tree v2.0.5 using its ModelFinder function before each analysis to

estimate the nucleotide substitution model best-fitted for each dataset by means of Bayesian information criterion (BIC). We assessed the support of the clusters formed by the different lineages both with the Shimodaira–Hasegawa approximate likelihood-ratio test (SH-aLRT) and with ultrafast bootstrap (UFboot) with 1000 replicates each.

**Supplemental Figure 1:** Frequencies (A) and proportions (B) of lineages of SARS-CoV-2 identified in adult patients during 10-month study period (October 2020 – August 2021) in a Chicago partner hospital. Corresponding data for children in this study are shown in Figure 1; the variant proportions and chronology in adults generally resembled what was observed in children during the same period.

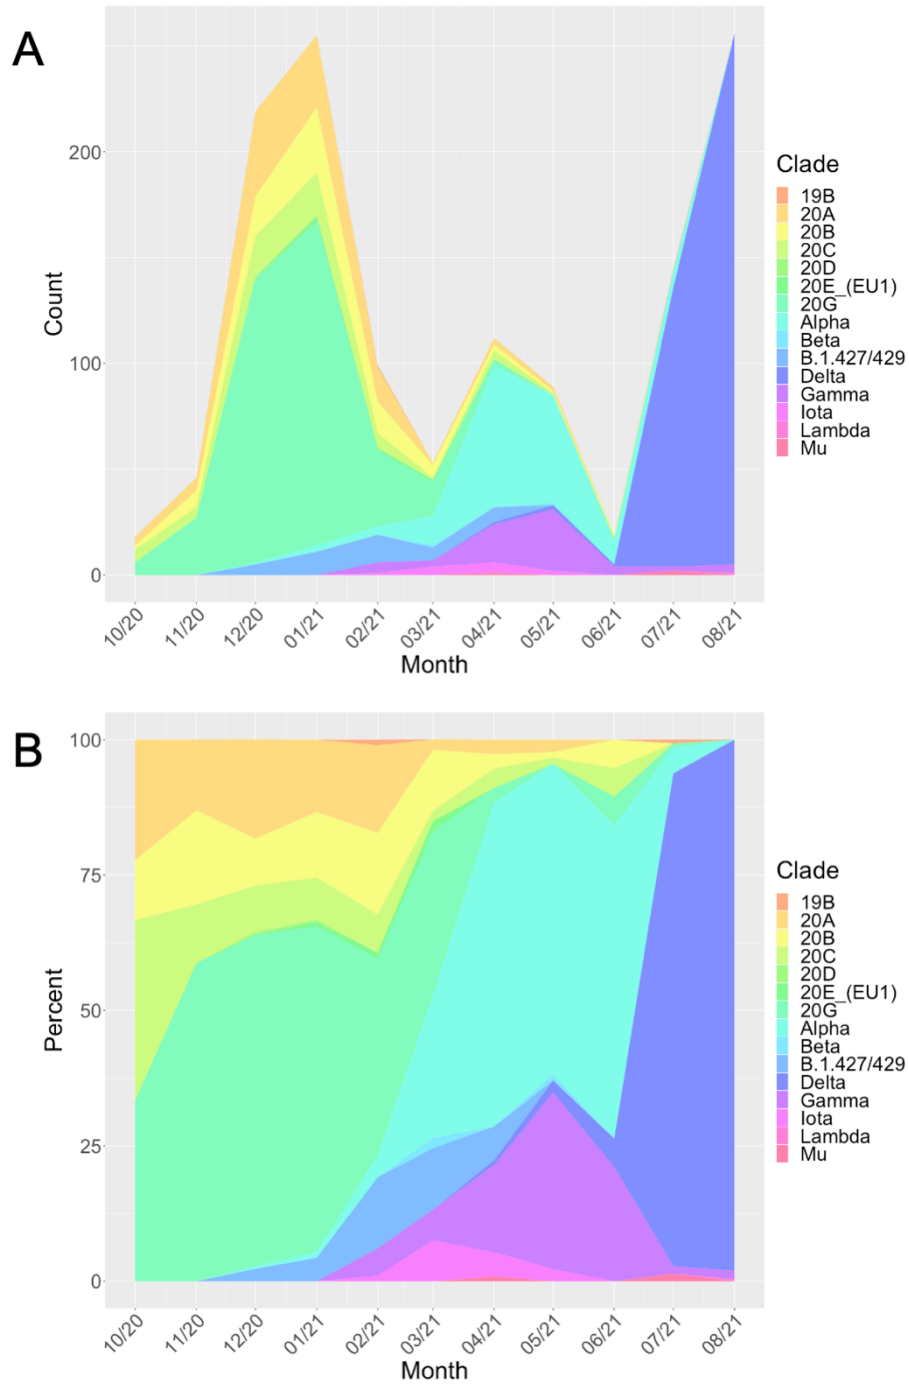

## Supplemental Tables

**eTable 1: GISAID Accession Numbers, Lineages, and Variant of Concern (VOC) Classification of 499 SARS-CoV-2 Sequences Included in Study**

| <b>ID</b> | <b>GISAID Accession</b> | <b>Pango Lineage</b> | <b>NextClade Clade</b> | <b>Variant Classification</b> |
|-----------|-------------------------|----------------------|------------------------|-------------------------------|
| LC_200    | EPI_ISL_1501823         | B.1.349              | 20C                    | Non-VOC                       |
| LC_201    | EPI_ISL_1501824         | B.1.582              | 20C                    | Non-VOC                       |
| LC_202    | EPI_ISL_1501825         | B.1.2                | 20G                    | Non-VOC                       |
| LC_203    | EPI_ISL_1501826         | B.1.2                | 20G                    | Non-VOC                       |
| LC_204    | EPI_ISL_1501827         | B.1.2                | 20G                    | Non-VOC                       |
| LC_205    | EPI_ISL_1501828         | B.1.2                | 20G                    | Non-VOC                       |
| LC_206    | EPI_ISL_1501829         | B.1.509              | 20C                    | Non-VOC                       |
| LC_207    | EPI_ISL_1501830         | B.1.2                | 20G                    | Non-VOC                       |
| LC_208    | EPI_ISL_1501831         | B.1.576              | 20C                    | Non-VOC                       |
| LC_209    | EPI_ISL_1501832         | B.1.2                | 20G                    | Non-VOC                       |
| LC_210    | EPI_ISL_1501833         | B.1.2                | 20G                    | Non-VOC                       |
| LC_211    | EPI_ISL_1501834         | B.1.2                | 20G                    | Non-VOC                       |
| LC_212    | EPI_ISL_1501835         | B.1.240              | 20A                    | Non-VOC                       |
| LC_213    | EPI_ISL_1501836         | B.1.243              | 20A                    | Non-VOC                       |
| LC_214    | EPI_ISL_1501837         | B.1.509              | 20C                    | Non-VOC                       |
| LC_215    | EPI_ISL_1501838         | B.1.2                | 20G                    | Non-VOC                       |
| LC_216    | EPI_ISL_1501839         | B.1.2                | 20G                    | Non-VOC                       |
| LC_217    | EPI_ISL_1501840         | B.1.240              | 20A                    | Non-VOC                       |
| LC_218    | EPI_ISL_1501841         | B.1.1.222            | 20B                    | Non-VOC                       |
| LC_219    | EPI_ISL_1501842         | B.1.2                | 20G                    | Non-VOC                       |
| LC_220    | EPI_ISL_1501843         | B.1.1                | 20B                    | Non-VOC                       |
| LC_221    | EPI_ISL_1501844         | B.1.1.518            | 20B                    | Non-VOC                       |
| LC_222    | EPI_ISL_1501845         | B.1.36.10            | 20A                    | Non-VOC                       |
| LC_223    | EPI_ISL_1501846         | B.1.139              | 20A                    | Non-VOC                       |
| LC_224    | EPI_ISL_1501847         | B.1.240              | 20A                    | Non-VOC                       |
| LC_225    | EPI_ISL_1501848         | B.1.2                | 20G                    | Non-VOC                       |
| LC_226    | EPI_ISL_1501849         | B.1.110.3            | 20A                    | Non-VOC                       |
| LC_227    | EPI_ISL_1501850         | B.1.2                | 20G                    | Non-VOC                       |
| LC_228    | EPI_ISL_1501851         | B.1.2                | 20G                    | Non-VOC                       |
| LC_229    | EPI_ISL_1501852         | B.1.2                | 20G                    | Non-VOC                       |
| LC_230    | EPI_ISL_1501853         | B.1.2                | 20G                    | Non-VOC                       |
| LC_231    | EPI_ISL_1501854         | B.1.2                | 20G                    | Non-VOC                       |
| LC_232    | EPI_ISL_1501855         | B.1.565              | 20A                    | Non-VOC                       |

|        |                 |           |     |         |
|--------|-----------------|-----------|-----|---------|
| LC_233 | EPI ISL 1501856 | B.1.1.434 | 20B | Non-VOC |
| LC_234 | EPI ISL 1501857 | B.1.2     | 20G | Non-VOC |
| LC_236 | EPI ISL 1501858 | B.1.1.518 | 20B | Non-VOC |
| LC_237 | EPI ISL 1501859 | B.1.2     | 20G | Non-VOC |
| LC_238 | EPI ISL 1501860 | B.1.2     | 20G | Non-VOC |
| LC_239 | EPI ISL 1501861 | B.1.2     | 20G | Non-VOC |
| LC_240 | EPI ISL 1501862 | B.1       | 20A | Non-VOC |
| LC_241 | EPI ISL 1501863 | B.1.2     | 20G | Non-VOC |
| LC_242 | EPI ISL 1501864 | B.1.2     | 20G | Non-VOC |
| LC_243 | EPI ISL 1501865 | B.1.2     | 20G | Non-VOC |
| LC_246 | EPI ISL 1501866 | B.1.2     | 20G | Non-VOC |
| LC_248 | EPI ISL 1501867 | B.1.2     | 20G | Non-VOC |
| LC_249 | EPI ISL 1501868 | B.1.2     | 20G | Non-VOC |
| LC_250 | EPI ISL 1501869 | B.1.2     | 20G | Non-VOC |
| LC_251 | EPI ISL 1501870 | B.1.2     | 20G | Non-VOC |
| LC_252 | EPI ISL 1501871 | C.31      | 20D | Non-VOC |
| LC_253 | EPI ISL 1501872 | B.1.2     | 20G | Non-VOC |
| LC_254 | EPI ISL 1501873 | B.1.2     | 20G | Non-VOC |
| LC_255 | EPI ISL 1501874 | B.1.324   | 20C | Non-VOC |
| LC_256 | EPI ISL 1501875 | B.1.2     | 20G | Non-VOC |
| LC_257 | EPI ISL 1501876 | B.1.2     | 20G | Non-VOC |
| LC_258 | EPI ISL 1501877 | B.1.2     | 20G | Non-VOC |
| LC_259 | EPI ISL 1501878 | B.1.2     | 20G | Non-VOC |
| LC_260 | EPI ISL 1501879 | B.1.2     | 20G | Non-VOC |
| LC_261 | EPI ISL 1501880 | B.1.2     | 20G | Non-VOC |
| LC_262 | EPI ISL 1501881 | B.1       | 20A | Non-VOC |
| LC_263 | EPI ISL 1501882 | B.1.2     | 20G | Non-VOC |
| LC_264 | EPI ISL 1501883 | B.1.2     | 20G | Non-VOC |
| LC_265 | EPI ISL 1501884 | B.1.1     | 20B | Non-VOC |
| LC_266 | EPI ISL 1501885 | B.1.2     | 20G | Non-VOC |
| LC_267 | EPI ISL 1501886 | B.1.2     | 20G | Non-VOC |
| LC_268 | EPI ISL 1501887 | B.1.2     | 20G | Non-VOC |
| LC_269 | EPI ISL 1501888 | B.1.2     | 20G | Non-VOC |
| LC_270 | EPI ISL 1501889 | B.1.565   | 20A | Non-VOC |
| LC_271 | EPI ISL 1501890 | B.1.2     | 20G | Non-VOC |
| LC_272 | EPI ISL 1501891 | B.1.2     | 20G | Non-VOC |
| LC_273 | EPI ISL 1501892 | B.1.2     | 20G | Non-VOC |
| LC_274 | EPI ISL 1501893 | B.1.234   | 20A | Non-VOC |
| LC_275 | EPI ISL 1501894 | B.1.2     | 20G | Non-VOC |

|        |                 |           |     |         |
|--------|-----------------|-----------|-----|---------|
| LC_276 | EPI ISL 1501895 | B.1.543   | 20A | Non-VOC |
| LC_277 | EPI ISL 1501896 | B.1.2     | 20G | Non-VOC |
| LC_278 | EPI ISL 1501897 | B.1.2     | 20G | Non-VOC |
| LC_279 | EPI ISL 1501898 | B.1.1.222 | 20B | Non-VOC |
| LC_280 | EPI ISL 1501899 | B.1.2     | 20G | Non-VOC |
| LC_281 | EPI ISL 1501900 | B.1.2     | 20G | Non-VOC |
| LC_282 | EPI ISL 1501901 | B.1.565   | 20A | Non-VOC |
| LC_283 | EPI ISL 1501902 | B.1.2     | 20G | Non-VOC |
| LC_284 | EPI ISL 1501903 | B.1.2     | 20G | Non-VOC |
| LC_285 | EPI ISL 1501904 | B.1.1.222 | 20B | Non-VOC |
| LC_286 | EPI ISL 1501905 | B.1.2     | 20G | Non-VOC |
| LC_287 | EPI ISL 1501906 | B.1.2     | 20G | Non-VOC |
| LC_288 | EPI ISL 1501907 | B.1.1.432 | 20B | Non-VOC |
| LC_289 | EPI ISL 1501908 | B.1.2     | 20G | Non-VOC |
| LC_290 | EPI ISL 1501909 | B.1.1.222 | 20B | Non-VOC |
| LC_291 | EPI ISL 1501910 | B.1.2     | 20G | Non-VOC |
| LC_292 | EPI ISL 1501911 | B.1.243   | 20A | Non-VOC |
| LC_293 | EPI ISL 1501912 | B.1.596   | 20G | Non-VOC |
| LC_294 | EPI ISL 1501913 | B.1.2     | 20G | Non-VOC |
| LC_295 | EPI ISL 1501914 | B.1.2     | 20G | Non-VOC |
| LC_296 | EPI ISL 1501915 | B.1.2     | 20G | Non-VOC |
| LC_297 | EPI ISL 1501916 | B.1.1     | 20B | Non-VOC |
| LC_299 | EPI ISL 1501918 | B.1       | 20A | Non-VOC |
| LC_300 | EPI ISL 1501919 | B.1.1.434 | 20B | Non-VOC |
| LC_301 | EPI ISL 1501920 | B.1.576   | 20C | Non-VOC |
| LC_303 | EPI ISL 1501921 | B.1.139   | 20A | Non-VOC |
| LC_305 | EPI ISL 1501922 | B.1.2     | 20G | Non-VOC |
| LC_306 | EPI ISL 1501923 | B.1.2     | 20G | Non-VOC |
| LC_307 | EPI ISL 1501924 | B.1.2     | 20G | Non-VOC |
| LC_308 | EPI ISL 1501925 | B.1.2     | 20G | Non-VOC |
| LC_310 | EPI ISL 1501927 | B.1.305   | 20C | Non-VOC |
| LC_311 | EPI ISL 1501928 | B.1.1.518 | 20B | Non-VOC |
| LC_312 | EPI ISL 1501929 | B.1.396   | 20A | Non-VOC |
| LC_314 | EPI ISL 1501930 | C.31      | 20D | Non-VOC |
| LC_315 | EPI ISL 1501931 | B.1.2     | 20G | Non-VOC |
| LC_316 | EPI ISL 1501932 | B.1.576   | 20C | Non-VOC |
| LC_317 | EPI ISL 1501933 | B.1       | 20B | Non-VOC |
| LC_318 | EPI ISL 1501934 | B.1.2     | 20G | Non-VOC |
| LC_319 | EPI ISL 1501935 | B.1.2     | 20G | Non-VOC |

|        |                 |           |     |         |
|--------|-----------------|-----------|-----|---------|
| LC_320 | EPI ISL 1501936 | B.1.2     | 20G | Non-VOC |
| LC_321 | EPI ISL 1501937 | B.1.2     | 20G | Non-VOC |
| LC_322 | EPI ISL 1501938 | B.1.2     | 20G | Non-VOC |
| LC_323 | EPI ISL 1501939 | B.1.1.518 | 20B | Non-VOC |
| LC_324 | EPI ISL 1501940 | B.1.1.416 | 20B | Non-VOC |
| LC_325 | EPI ISL 1501941 | B.1.595   | 20C | Non-VOC |
| LC_326 | EPI ISL 1501942 | B.1.2     | 20G | Non-VOC |
| LC_327 | EPI ISL 1501943 | B.1.578   | 20C | Non-VOC |
| LC_328 | EPI ISL 1501944 | B.1       | 20A | Non-VOC |
| LC_329 | EPI ISL 1501945 | B.1.2     | 20G | Non-VOC |
| LC_330 | EPI ISL 1501946 | B.1.2     | 20G | Non-VOC |
| LC_331 | EPI ISL 1501947 | B.1.2     | 20G | Non-VOC |
| LC_332 | EPI ISL 1501948 | B.1.2     | 20G | Non-VOC |
| LC_333 | EPI ISL 1501949 | B.1.2     | 20G | Non-VOC |
| LC_334 | EPI ISL 1501950 | B.1.565   | 20A | Non-VOC |
| LC_335 | EPI ISL 1501951 | B.1.509   | 20C | Non-VOC |
| LC_336 | EPI ISL 1501952 | B.1.2     | 20G | Non-VOC |
| LC_338 | EPI ISL 1501953 | B.1.1.317 | 20B | Non-VOC |
| LC_339 | EPI ISL 1501954 | B.1.2     | 20G | Non-VOC |
| LC_340 | EPI ISL 1501955 | B.1.2     | 20G | Non-VOC |
| LC_341 | EPI ISL 1501956 | B.1.427   | 20C | Non-VOC |
| LC_342 | EPI ISL 1501957 | B.1.232   | 20A | Non-VOC |
| LC_346 | EPI ISL 1501959 | B.1.2     | 20G | Non-VOC |
| LC_347 | EPI ISL 1501960 | B.1.1.192 | 20B | Non-VOC |
| LC_348 | EPI ISL 1501961 | B.1.2     | 20G | Non-VOC |
| LC_349 | EPI ISL 1501962 | B.1.2     | 20G | Non-VOC |
| LC_350 | EPI ISL 1501963 | B.1.240   | 20A | Non-VOC |
| LC_351 | EPI ISL 1501964 | A.2.5     | 19B | Non-VOC |
| LC_352 | EPI ISL 1501965 | B.1.2     | 20G | Non-VOC |
| LC_353 | EPI ISL 1501966 | B.1.2     | 20G | Non-VOC |
| LC_354 | EPI ISL 1501967 | B.1.232   | 20A | Non-VOC |
| LC_355 | EPI ISL 1501968 | B.1.139   | 20A | Non-VOC |
| LC_356 | EPI ISL 1501969 | B.1.576   | 20C | Non-VOC |
| LC_357 | EPI ISL 1501970 | B.1.2     | 20G | Non-VOC |
| LC_359 | EPI ISL 1501972 | B.1       | 20C | Non-VOC |
| LC_360 | EPI ISL 1501973 | B.1.2     | 20G | Non-VOC |
| LC_361 | EPI ISL 1501974 | B.1.2     | 20G | Non-VOC |
| LC_362 | EPI ISL 1501975 | B.1.429   | 20C | Non-VOC |
| LC_363 | EPI ISL 1501976 | B.1.2     | 20G | Non-VOC |

|        |                 |           |             |         |
|--------|-----------------|-----------|-------------|---------|
| LC_365 | EPI ISL 1501977 | B.1.2     | 20G         | Non-VOC |
| LC_367 | EPI ISL 1501978 | B.1.2     | 20G         | Non-VOC |
| LC_368 | EPI ISL 1501979 | B.1.2     | 20G         | Non-VOC |
| LC_370 | EPI ISL 1501980 | B.1.2     | 20G         | Non-VOC |
| LC_371 | EPI ISL 1501981 | B.1.427   | 20C         | Non-VOC |
| LC_373 | EPI ISL 1501983 | B.1.1.7   | 20I/501Y.V1 | Alpha   |
| LC_374 | EPI ISL 1501984 | B.1.2     | 20G         | Non-VOC |
| LC_375 | EPI ISL 1501985 | B.1.2     | 20G         | Non-VOC |
| LC_376 | EPI ISL 1501986 | B.1.2     | 20G         | Non-VOC |
| LC_377 | EPI ISL 1501987 | B.1.2     | 20G         | Non-VOC |
| LC_378 | EPI ISL 1501988 | B.1.1.7   | 20I/501Y.V1 | Alpha   |
| LC_379 | EPI ISL 1501989 | B.1.1.518 | 20B         | Non-VOC |
| LC_380 | EPI ISL 1501990 | B.1.2     | 20G         | Non-VOC |
| LC_381 | EPI ISL 1501991 | B.1.232   | 20A         | Non-VOC |
| LC_382 | EPI ISL 1501992 | B.1.596   | 20G         | Non-VOC |
| LC_383 | EPI ISL 1501993 | B.1       | 20C         | Non-VOC |
| LC_384 | EPI ISL 1501994 | B.1.429   | 20C         | Non-VOC |
| LC_385 | EPI ISL 1501995 | B.1.239   | 20A         | Non-VOC |
| LC_386 | EPI ISL 1501996 | B.1.1.519 | 20B         | Non-VOC |
| LC_387 | EPI ISL 1501997 | B.1.427   | 20C         | Non-VOC |
| LC_388 | EPI ISL 1501998 | B.1.1.222 | 20B         | Non-VOC |
| LC_389 | EPI ISL 1501999 | B.1.2     | 20G         | Non-VOC |
| LC_390 | EPI ISL 1502000 | B.1.243   | 20A         | Non-VOC |
| LC_391 | EPI ISL 1502001 | B.1.2     | 20G         | Non-VOC |
| LC_392 | EPI ISL 1502002 | B.1.2     | 20G         | Non-VOC |
| LC_393 | EPI ISL 1502003 | B.1.2     | 20G         | Non-VOC |
| LC_394 | EPI ISL 1502004 | B.1.609   | 20A         | Non-VOC |
| LC_396 | EPI ISL 1502005 | B.1.427   | 20C         | Non-VOC |
| LC_397 | EPI ISL 1502006 | B.1.427   | 20C         | Non-VOC |
| LC_398 | EPI ISL 1502007 | B.1.429   | 20C         | Non-VOC |
| LC_399 | EPI ISL 1502008 | B.1.1.7   | 20I/501Y.V1 | Alpha   |
| LC_400 | EPI ISL 1502009 | B.1.2     | 20G         | Non-VOC |
| LC_401 | EPI ISL 1502010 | B.1.2     | 20G         | Non-VOC |
| LC_403 | EPI ISL 1502011 | B.1.427   | 20C         | Non-VOC |
| LC_404 | EPI ISL 1502012 | B.1.2     | 20G         | Non-VOC |
| LC_405 | EPI ISL 1502013 | B.1.1.7   | 20I/501Y.V1 | Alpha   |
| LC_406 | EPI ISL 1502014 | B.1.2     | 20G         | Non-VOC |
| LC_409 | EPI ISL 1502015 | B.1.2     | 20G         | Non-VOC |
| LC_410 | EPI ISL 1502016 | B.1.2     | 20G         | Non-VOC |



|        |                 |           |             |         |
|--------|-----------------|-----------|-------------|---------|
| LC_411 | EPI ISL 1502017 | B.1.2     | 20G         | Non-VOC |
| LC_412 | EPI ISL 1502018 | B.1.243   | 20A         | Non-VOC |
| LC_413 | EPI ISL 1502019 | B.1.2     | 20G         | Non-VOC |
| LC_414 | EPI ISL 1502020 | B.1.400   | 20A         | Non-VOC |
| LC_415 | EPI ISL 1502021 | P.1       | 20J/501Y.V3 | Gamma   |
| LC_416 | EPI ISL 1502022 | B.1.400   | 20A         | Non-VOC |
| LC_417 | EPI ISL 1502023 | B.1.243   | 20A         | Non-VOC |
| LC_418 | EPI ISL 1502024 | B.1.2     | 20G         | Non-VOC |
| LC_420 | EPI ISL 1502025 | P.2       | 20B         | Non-VOC |
| LC_421 | EPI ISL 1502026 | B.1.1.222 | 20B         | Non-VOC |
| LC_422 | EPI ISL 1502027 | P.1       | 20J/501Y.V3 | Gamma   |
| LC_423 | EPI ISL 1502028 | B.1.239   | 20A         | Non-VOC |
| LC_424 | EPI ISL 1502029 | B.1.1.519 | 20B         | Non-VOC |
| LC_425 | EPI ISL 1502030 | B.1.1.7   | 20I/501Y.V1 | Alpha   |
| LC_426 | EPI ISL 1502031 | B.1.2     | 20G         | Non-VOC |
| LC_427 | EPI ISL 1502032 | B.1.1.7   | 20I/501Y.V1 | Alpha   |
| LC_428 | EPI ISL 1502033 | B.1.2     | 20G         | Non-VOC |
| LC_429 | EPI ISL 1502034 | P.2       | 20B         | Non-VOC |
| LC_430 | EPI ISL 1502035 | B.1.2     | 20G         | Non-VOC |
| LC_431 | EPI ISL 1502036 | B.1.1.7   | 20I/501Y.V1 | Alpha   |
| LC_432 | EPI ISL 1502037 | B.1.427   | 20C         | Non-VOC |
| LC_433 | EPI ISL 1502038 | B.1.1.7   | 20I/501Y.V1 | Alpha   |
| LC_434 | EPI ISL 1502039 | B.1.2     | 20G         | Non-VOC |
| LC_435 | EPI ISL 1502040 | P.1       | 20J/501Y.V3 | Gamma   |
| LC_436 | EPI ISL 1502041 | B.1.1.7   | 20I/501Y.V1 | Alpha   |
| LC_437 | EPI ISL 1502042 | B.1.1.7   | 20I/501Y.V1 | Alpha   |
| LC_438 | EPI ISL 1502043 | B.1.427   | 20C         | Non-VOC |
| LC_439 | EPI ISL 1502044 | B.1.427   | 20C         | Non-VOC |
| LC_440 | EPI ISL 1502045 | B.1.1.519 | 20B         | Non-VOC |
| LC_441 | EPI ISL 1502046 | B.1.427   | 20C         | Non-VOC |
| LC_442 | EPI ISL 1502047 | B.1.427   | 20C         | Non-VOC |
| LC_443 | EPI ISL 1704763 | B.1.1.7   | 20I/501Y.V1 | Alpha   |
| LC_444 | EPI ISL 1704764 | B.1.1.7   | 20I/501Y.V1 | Alpha   |
| LC_445 | EPI ISL 1704765 | B.1.429   | 20C         | Non-VOC |
| LC_446 | EPI ISL 1704766 | B.1.429   | 20C         | Non-VOC |
| LC_447 | EPI ISL 1704767 | B.1.2     | 20G         | Non-VOC |
| LC_448 | EPI ISL 1704768 | B.1.2     | 20G         | Non-VOC |
| LC_449 | EPI ISL 1704769 | B.1.2     | 20G         | Non-VOC |
| LC_450 | EPI ISL 1704770 | B.1.526   | 20C         | Non-VOC |

|        |                 |           |             |         |
|--------|-----------------|-----------|-------------|---------|
| LC_451 | EPI ISL 1704771 | B.1.1.7   | 20I/501Y.V1 | Alpha   |
| LC_452 | EPI ISL 1704772 | P.1       | 20J/501Y.V3 | Gamma   |
| LC_453 | EPI ISL 1704773 | B.1.1.7   | 20I/501Y.V1 | Alpha   |
| LC_454 | EPI ISL 1704715 | B.1.2     | 20G         | Non-VOC |
| LC_455 | EPI ISL 1704716 | B.1.429   | 20C         | Non-VOC |
| LC_456 | EPI ISL 1704717 | B.1.427   | 20C         | Non-VOC |
| LC_457 | EPI ISL 1704718 | B.1.427   | 20C         | Non-VOC |
| LC_458 | EPI ISL 1704719 | B.1.427   | 20C         | Non-VOC |
| LC_459 | EPI ISL 1704720 | B.1.1.519 | 20B         | Non-VOC |
| LC_460 | EPI ISL 1704721 | B.1.1.519 | 20B         | Non-VOC |
| LC_461 | EPI ISL 1704722 | R.1       | 20B         | Non-VOC |
| LC_462 | EPI ISL 1704723 | B.1.1.7   | 20I/501Y.V1 | Alpha   |
| LC_463 | EPI ISL 1704724 | B.1.2     | 20G         | Non-VOC |
| LC_464 | EPI ISL 1704725 | B.1.2     | 20G         | Non-VOC |
| LC_465 | EPI ISL 1704726 | B.1.1.7   | 20I/501Y.V1 | Alpha   |
| LC_466 | EPI ISL 1704727 | B.1.429   | 20C         | Non-VOC |
| LC_467 | EPI ISL 1704728 | B.1.1.7   | 20I/501Y.V1 | Alpha   |
| LC_468 | EPI ISL 1704729 | P.1       | 20J/501Y.V3 | Gamma   |
| LC_469 | EPI ISL 1704730 | B.1.1.7   | 20I/501Y.V1 | Alpha   |
| LC_470 | EPI ISL 2009368 | B.1.2     | 20G         | Non-VOC |
| LC_471 | EPI ISL 2009369 | P.1       | 20J/501Y.V3 | Gamma   |
| LC_472 | EPI ISL 2009370 | Q.3       | 20I/501Y.V1 | Alpha   |
| LC_473 | EPI ISL 2009371 | P.1       | 20J/501Y.V3 | Gamma   |
| LC_474 | EPI ISL 2009372 | B.1.1.7   | 20I/501Y.V1 | Alpha   |
| LC_475 | EPI ISL 2009373 | B.1.1.7   | 20I/501Y.V1 | Alpha   |
| LC_476 | EPI ISL 2009374 | B.1.1.7   | 20I/501Y.V1 | Alpha   |
| LC_477 | EPI ISL 2009375 | B.1.1.7   | 20I/501Y.V1 | Alpha   |
| LC_478 | EPI ISL 1704731 | B.1.429   | 20C         | Non-VOC |
| LC_479 | EPI ISL 1704732 | B.1.351   | 20H/501Y.V2 | Beta    |
| LC_480 | EPI ISL 1704733 | B.1.351   | 20H/501Y.V2 | Beta    |
| LC_481 | EPI ISL 1704734 | B.1.1.7   | 20I/501Y.V1 | Alpha   |
| LC_482 | EPI ISL 1704735 | B.1.596   | 20G         | Non-VOC |
| LC_483 | EPI ISL 1704736 | B.1.1.7   | 20I/501Y.V1 | Alpha   |
| LC_484 | EPI ISL 1704737 | B.1.1.7   | 20I/501Y.V1 | Alpha   |
| LC_485 | EPI ISL 1704738 | P.1       | 20J/501Y.V3 | Gamma   |
| LC_486 | EPI ISL 1704739 | B.1.1.7   | 20I/501Y.V1 | Alpha   |
| LC_487 | EPI ISL 1704740 | B.1.526   | 20C         | Non-VOC |
| LC_488 | EPI ISL 1704741 | P.1       | 20J/501Y.V3 | Gamma   |
| LC_489 | EPI ISL 1704742 | B.1.1.7   | 20I/501Y.V1 | Alpha   |

|        |                 |         |             |         |
|--------|-----------------|---------|-------------|---------|
| LC_490 | EPI ISL 1704743 | B.1.1.7 | 20I/501Y.V1 | Alpha   |
| LC_491 | EPI ISL 1704744 | P.1     | 20J/501Y.V3 | Gamma   |
| LC_492 | EPI ISL 1704745 | B.1.1.7 | 20I/501Y.V1 | Alpha   |
| LC_493 | EPI ISL 1704746 | B.1.1.7 | 20I/501Y.V1 | Alpha   |
| LC_494 | EPI ISL 1704747 | B.1.1.7 | 20I/501Y.V1 | Alpha   |
| LC_495 | EPI ISL 1704748 | B.1.1.7 | 20I/501Y.V1 | Alpha   |
| LC_496 | EPI ISL 1704749 | B.1.1.7 | 20I/501Y.V1 | Alpha   |
| LC_497 | EPI ISL 1704750 | B.1.2   | 20G         | Non-VOC |
| LC_498 | EPI ISL 1704751 | P.1     | 20J/501Y.V3 | Gamma   |
| LC_499 | EPI ISL 1704752 | B.1.427 | 20C         | Non-VOC |
| LC_500 | EPI ISL 1704753 | B.1.427 | 20C         | Non-VOC |
| LC_501 | EPI ISL 1704754 | B.1.1.7 | 20I/501Y.V1 | Alpha   |
| LC_502 | EPI ISL 1704755 | B.1.1.7 | 20I/501Y.V1 | Alpha   |
| LC_503 | EPI ISL 1704756 | P.1.12  | 20J/501Y.V3 | Gamma   |
| LC_504 | EPI ISL 1704757 | B.1.1.7 | 20I/501Y.V1 | Alpha   |
| LC_505 | EPI ISL 1704758 | B.1.427 | 20C         | Non-VOC |
| LC_506 | EPI ISL 1704759 | B.1.429 | 20C         | Non-VOC |
| LC_507 | EPI ISL 1704760 | R.1     | 20B         | Non-VOC |
| LC_508 | EPI ISL 1704761 | R.1     | 20B         | Non-VOC |
| LC_509 | EPI ISL 1704762 | B.1.1.7 | 20I/501Y.V1 | Alpha   |
| LC_510 | EPI ISL 2009376 | B.1.1.7 | 20I/501Y.V1 | Alpha   |
| LC_512 | EPI ISL 2009377 | B.1.1.7 | 20I/501Y.V1 | Alpha   |
| LC_513 | EPI ISL 2009378 | P.2     | 20B         | Non-VOC |
| LC_515 | EPI ISL 2009380 | B.1.1.7 | 20I/501Y.V1 | Alpha   |
| LC_516 | EPI ISL 2009381 | B.1.637 | 20C         | Non-VOC |
| LC_517 | EPI ISL 2009382 | B.1.1.7 | 20I/501Y.V1 | Alpha   |
| LC_519 | EPI ISL 2009383 | B.1.1.7 | 20I/501Y.V1 | Alpha   |
| LC_520 | EPI ISL 2009384 | B.1.1.7 | 20I/501Y.V1 | Alpha   |
| LC_521 | EPI ISL 2009385 | B.1.1.7 | 20I/501Y.V1 | Alpha   |
| LC_523 | EPI ISL 2009386 | B.1.429 | 20C         | Non-VOC |
| LC_524 | EPI ISL 2009387 | B.1.1.7 | 20I/501Y.V1 | Alpha   |
| LC_525 | EPI ISL 2009388 | B.1.1.7 | 20I/501Y.V1 | Alpha   |
| LC_526 | EPI ISL 2009389 | P.1     | 20J/501Y.V3 | Gamma   |
| LC_527 | EPI ISL 2009390 | B.1.1.7 | 20I/501Y.V1 | Alpha   |
| LC_528 | EPI ISL 2009391 | B.1.1.7 | 20I/501Y.V1 | Alpha   |
| LC_529 | EPI ISL 2009392 | B.1.351 | 20H/501Y.V2 | Beta    |
| LC_531 | EPI ISL 2009394 | P.1     | 20J/501Y.V3 | Gamma   |
| LC_532 | EPI ISL 2009395 | P.1     | 20J/501Y.V3 | Gamma   |
| LC_578 | EPI ISL 2373051 | B.1.1.7 | 20I/501Y.V1 | Alpha   |

|        |                 |           |             |         |
|--------|-----------------|-----------|-------------|---------|
| LC_580 | EPI ISL 2373052 | B.1.1.519 | 20B         | Non-VOC |
| LC_581 | EPI ISL 2373053 | B.1.1.7   | 20I/501Y.V1 | Alpha   |
| LC_582 | EPI ISL 2373054 | B.1.1.7   | 20I/501Y.V1 | Alpha   |
| LC_583 | EPI ISL 2373055 | P.1       | 20J/501Y.V3 | Gamma   |
| LC_584 | EPI ISL 2373056 | B.1.1.7   | 20I/501Y.V1 | Alpha   |
| LC_586 | EPI ISL 2373057 | P.1       | 20J/501Y.V3 | Gamma   |
| LC_587 | EPI ISL 2373058 | Q.3       | 20I/501Y.V1 | Alpha   |
| LC_590 | EPI ISL 2373059 | B.1.1.7   | 20I/501Y.V1 | Alpha   |
| LC_591 | EPI ISL 2373060 | B.1.1.7   | 20I/501Y.V1 | Alpha   |
| LC_592 | EPI ISL 2373061 | P.1       | 20J/501Y.V3 | Gamma   |
| LC_593 | EPI ISL 2373062 | P.1       | 20J/501Y.V3 | Gamma   |
| LC_594 | EPI ISL 2373063 | B.1.637   | 20C         | Non-VOC |
| LC_595 | EPI ISL 2373064 | P.1       | 20J/501Y.V3 | Gamma   |
| LC_596 | EPI ISL 2373065 | B.1.1.7   | 20I/501Y.V1 | Alpha   |
| LC_597 | EPI ISL 2373066 | B.1.1.7   | 20I/501Y.V1 | Alpha   |
| LC_598 | EPI ISL 2373067 | B.1.1.7   | 20I/501Y.V1 | Alpha   |
| LC_599 | EPI ISL 2373068 | B.1.1.519 | 20B         | Non-VOC |
| LC_600 | EPI ISL 2373069 | P.1       | 20J/501Y.V3 | Gamma   |
| LC_601 | EPI ISL 2373070 | P.1       | 20J/501Y.V3 | Gamma   |
| LC_604 | EPI ISL 2373071 | None      | 20I/501Y.V1 | Alpha   |
| LC_605 | EPI ISL 2373072 | B.1.1.7   | 20I/501Y.V1 | Alpha   |
| LC_606 | EPI ISL 2373073 | B.1.1.7   | 20I/501Y.V1 | Alpha   |
| LC_607 | EPI ISL 2373074 | B.1.1.7   | 20I/501Y.V1 | Alpha   |
| LC_608 | EPI ISL 2373075 | B.1.1.7   | 20I/501Y.V1 | Alpha   |
| LC_609 | EPI ISL 2373076 | P.1       | 20J/501Y.V3 | Gamma   |
| LC_610 | EPI ISL 2373077 | B.1.1.222 | 20B         | Non-VOC |
| LC_611 | EPI ISL 2373078 | B.1.1.7   | 20I/501Y.V1 | Alpha   |
| LC_612 | EPI ISL 2373079 | P.1       | 20J/501Y.V3 | Gamma   |
| LC_613 | EPI ISL 2373080 | B.1.1.7   | 20I/501Y.V1 | Alpha   |
| LC_614 | EPI ISL 2373081 | P.1       | 20J/501Y.V3 | Gamma   |
| LC_615 | EPI ISL 2373082 | B.1.1.7   | 20I/501Y.V1 | Alpha   |
| LC_616 | EPI ISL 2373083 | B.1.1.7   | 20I/501Y.V1 | Alpha   |
| LC_617 | EPI ISL 2373084 | B.1.1.7   | 20I/501Y.V1 | Alpha   |
| LC_618 | EPI ISL 2373085 | B.1.1.7   | 20I/501Y.V1 | Alpha   |
| LC_619 | EPI ISL 2373086 | B.1.525   | 20A         | Non-VOC |
| LC_620 | EPI ISL 2373087 | B.1.1.7   | 20I/501Y.V1 | Alpha   |
| LC_621 | EPI ISL 2373088 | B.1.1.7   | 20I/501Y.V1 | Alpha   |
| LC_622 | EPI ISL 2373089 | B.1.1.7   | 20I/501Y.V1 | Alpha   |
| LC_623 | EPI ISL 2373090 | B.1.1.7   | 20I/501Y.V1 | Alpha   |

|        |                 |         |                 |       |
|--------|-----------------|---------|-----------------|-------|
| LC_624 | EPI ISL 2373091 | B.1.1.7 | 20I/501Y.V1     | Alpha |
| LC_625 | EPI ISL 2373092 | B.1.1.7 | 20I/501Y.V1     | Alpha |
| LC_626 | EPI ISL 2373093 | B.1.1.7 | 20I/501Y.V1     | Alpha |
| LC_627 | EPI ISL 2373094 | P.1     | 20J/501Y.V3     | Gamma |
| LC_628 | EPI ISL 2373095 | B.1.1.7 | 20I/501Y.V1     | Alpha |
| LC_629 | EPI ISL 2373096 | B.1.1.7 | 20I/501Y.V1     | Alpha |
| LC_630 | EPI ISL 2373097 | B.1.1.7 | 20I/501Y.V1     | Alpha |
| LC_631 | EPI ISL 2373098 | B.1.1.7 | 20I/501Y.V1     | Alpha |
| LC_632 | EPI ISL 2373099 | B.1.1.7 | 20I/501Y.V1     | Alpha |
| LC_633 | EPI ISL 2373100 | P.1     | 20J/501Y.V3     | Gamma |
| LC_634 | EPI ISL 2373101 | B.1.1.7 | 20I/501Y.V1     | Alpha |
| LC_635 | EPI ISL 2373102 | B.1.1.7 | 20I/501Y.V1     | Alpha |
| LC_636 | EPI ISL 2373103 | P.1     | 20J/501Y.V3     | Gamma |
| LC_637 | EPI ISL 2373104 | P.1     | 20J/501Y.V3     | Gamma |
| LC_638 | EPI ISL 2373105 | B.1.1.7 | 20I/501Y.V1     | Alpha |
| LC_639 | EPI ISL 2373106 | B.1.1.7 | 20I/501Y.V1     | Alpha |
| LC_640 | EPI ISL 2373107 | P.1     | 20J/501Y.V3     | Gamma |
| LC_641 | EPI ISL 2842585 | P.1     | 20J (Gamma, V3) | Gamma |
| LC_642 | EPI ISL 2842586 | None    | 20I (Alpha, V1) | Alpha |
| LC_643 | EPI ISL 2842587 | P.1     | 20J (Gamma, V3) | Gamma |
| LC_644 | EPI ISL 2842588 | B.1.1.7 | 20I (Alpha, V1) | Alpha |
| LC_645 | EPI ISL 2842589 | P.1     | 20J (Gamma, V3) | Gamma |
| LC_646 | EPI ISL 2842590 | B.1.1.7 | 20I (Alpha, V1) | Alpha |
| LC_647 | EPI ISL 2842591 | B.1.1.7 | 20I (Alpha, V1) | Alpha |
| LC_648 | EPI ISL 2842592 | B.1.1.7 | 20I (Alpha, V1) | Alpha |
| LC_649 | EPI ISL 2842593 | B.1.1.7 | 20I (Alpha, V1) | Alpha |
| LC_650 | EPI ISL 2842594 | P.1     | 20J (Gamma, V3) | Gamma |
| LC_651 | EPI ISL 2842595 | B.1.1.7 | 20I (Alpha, V1) | Alpha |
| LC_654 | EPI ISL 2842580 | AY.5    | 21A (Delta)     | Delta |
| LC_655 | EPI ISL 2842581 | P.1     | 20J (Gamma, V3) | Gamma |
| LC_657 | EPI ISL 2842582 | P.1     | 20J (Gamma, V3) | Gamma |
| LC_658 | EPI ISL 2842583 | P.1     | 20J (Gamma, V3) | Gamma |

|        |                 |           |                 |       |
|--------|-----------------|-----------|-----------------|-------|
| LC_659 | EPI ISL 2842584 | B.1.1.7   | 20I (Alpha, V1) | Alpha |
| LC_660 | EPI ISL 3304311 | AY.4      | 21A (Delta)     | Delta |
| LC_661 | EPI ISL 3304312 | B.1.1.7   | 20I (Alpha, V1) | Alpha |
| LC_662 | EPI ISL 3304313 | B.1.617.2 | 21A (Delta)     | Delta |
| LC_663 | EPI ISL 3185847 | P.1       | 20J (Gamma, V3) | Gamma |
| LC_664 | EPI ISL 3185848 | AY.3      | 21A (Delta)     | Delta |
| LC_665 | EPI ISL 3185849 | AY.3      | 21A (Delta)     | Delta |
| LC_666 | EPI ISL 3185850 | AY.25     | 21A (Delta)     | Delta |
| LC_667 | EPI ISL 3185851 | AY.4      | 21A (Delta)     | Delta |
| LC_671 | EPI ISL 3304314 | AY.23     | 21A (Delta)     | Delta |
| LC_672 | EPI ISL 3304315 | AY.4      | 21A (Delta)     | Delta |
| LC_673 | EPI ISL 3304316 | B.1.617.2 | 21A (Delta)     | Delta |
| LC_674 | EPI ISL 3304317 | AY.5      | 21A (Delta)     | Delta |
| LC_675 | EPI ISL 3304318 | AY.25     | 21A (Delta)     | Delta |
| LC_677 | EPI ISL 3304319 | B.1.617.2 | 21A (Delta)     | Delta |
| LC_679 | EPI ISL 3304320 | AY.4      | 21A (Delta)     | Delta |
| LC_680 | EPI ISL 3304321 | AY.4      | 21A (Delta)     | Delta |
| LC_681 | EPI ISL 3304322 | AY.25     | 21A (Delta)     | Delta |
| LC_682 | EPI ISL 3304323 | AY.4      | 21A (Delta)     | Delta |
| LC_683 | EPI ISL 3304324 | B.1.617.2 | 21A (Delta)     | Delta |
| LC_684 | EPI ISL 3304325 | B.1.617.2 | 21A (Delta)     | Delta |
| LC_685 | EPI ISL 3304326 | AY.4      | 21A (Delta)     | Delta |
| LC_686 | EPI ISL 3304327 | B.1.1.7   | 20I (Alpha, V1) | Alpha |
| LC_687 | EPI ISL 3304328 | AY.20     | 21A (Delta)     | Delta |
| LC_688 | EPI ISL 3304329 | B.1.617.2 | 21A (Delta)     | Delta |
| LC_689 | EPI ISL 3304330 | B.1.617.2 | 21A (Delta)     | Delta |
| LC_690 | EPI ISL 3304331 | AY.3      | 21A (Delta)     | Delta |
| LC_691 | EPI ISL 3304332 | AY.26     | 21A (Delta)     | Delta |
| LC_692 | EPI ISL 3304333 | B.1.617.2 | 21A (Delta)     | Delta |
| LC_693 | EPI ISL 3304334 | B.1.617.2 | 21A (Delta)     | Delta |
| LC_694 | EPI ISL 3304335 | AY.4      | 21A (Delta)     | Delta |
| LC_695 | EPI ISL 3304336 | AY.3      | 21A (Delta)     | Delta |
| LC_697 | EPI ISL 3304338 | B.1.617.2 | 21A (Delta)     | Delta |
| LC_698 | EPI ISL 3304339 | AY.10     | 21A (Delta)     | Delta |
| LC_700 | EPI ISL 3304340 | AY.4      | 21A (Delta)     | Delta |
| LC_701 | EPI ISL 3304341 | AY.3      | 21A (Delta)     | Delta |
| LC_702 | EPI ISL 3304342 | B.1.617.2 | 21A (Delta)     | Delta |

|        |                 |           |             |       |
|--------|-----------------|-----------|-------------|-------|
| LC_703 | EPI ISL 3304343 | B.1.617.2 | 21A (Delta) | Delta |
| LC_704 | EPI ISL 3304344 | B.1.617.2 | 21A (Delta) | Delta |
| LC_705 | EPI ISL 4026596 | B.1.617.2 | 21A (Delta) | Delta |
| LC_706 | EPI ISL 4026597 | AY.3      | 21A (Delta) | Delta |
| LC_707 | EPI ISL 4026598 | AY.3      | 21A (Delta) | Delta |
| LC_708 | EPI ISL 4026599 | B.1.617.2 | 21A (Delta) | Delta |
| LC_709 | EPI ISL 4026600 | B.1.617.2 | 21A (Delta) | Delta |
| LC_710 | EPI ISL 4026601 | AY.26     | 21A (Delta) | Delta |
| LC_711 | EPI ISL 4026602 | AY.25     | 21A (Delta) | Delta |
| LC_712 | EPI ISL 4026603 | AY.3      | 21A (Delta) | Delta |
| LC_713 | EPI ISL 4026604 | B.1.617.2 | 21A (Delta) | Delta |
| LC_714 | EPI ISL 4026605 | B.1.617.2 | 21A (Delta) | Delta |
| LC_715 | EPI ISL 4026606 | AY.25     | 21A (Delta) | Delta |
| LC_716 | EPI ISL 4026607 | B.1.617.2 | 21A (Delta) | Delta |
| LC_717 | EPI ISL 4026608 | AY.3.1    | 21A (Delta) | Delta |
| LC_718 | EPI ISL 4026609 | AY.3      | 21A (Delta) | Delta |
| LC_719 | EPI ISL 4026610 | AY.25     | 21A (Delta) | Delta |
| LC_720 | EPI ISL 4026611 | AY.25     | 21A (Delta) | Delta |
| LC_721 | EPI ISL 4026612 | AY.3      | 21A (Delta) | Delta |
| LC_722 | EPI ISL 4026613 | B.1.617.2 | 21A (Delta) | Delta |
| LC_723 | EPI ISL 4026614 | AY.25     | 21A (Delta) | Delta |
| LC_724 | EPI ISL 4026615 | AY.14     | 21A (Delta) | Delta |
| LC_725 | EPI ISL 4026616 | AY.25     | 21A (Delta) | Delta |
| LC_727 | EPI ISL 4026618 | B.1.617.2 | 21A (Delta) | Delta |
| LC_728 | EPI ISL 4026619 | B.1.617.2 | 21A (Delta) | Delta |
| LC_730 | EPI ISL 4026620 | AY.3      | 21A (Delta) | Delta |
| LC_731 | EPI ISL 4026621 | AY.3      | 21A (Delta) | Delta |
| LC_732 | EPI ISL 4026622 | B.1.617.2 | 21A (Delta) | Delta |
| LC_733 | EPI ISL 4026623 | AY.3      | 21A (Delta) | Delta |
| LC_735 | EPI ISL 4026624 | B.1.617.2 | 21A (Delta) | Delta |
| LC_736 | EPI ISL 4026625 | AY.26     | 21A (Delta) | Delta |
| LC_737 | EPI ISL 4026626 | AY.25     | 21A (Delta) | Delta |
| LC_739 | EPI ISL 4026627 | AY.25     | 21A (Delta) | Delta |
| LC_740 | EPI ISL 4026628 | B.1.617.2 | 21A (Delta) | Delta |
| LC_741 | EPI ISL 4026629 | B.1.617.2 | 21A (Delta) | Delta |
| LC_742 | EPI ISL 4026630 | AY.3      | 21A (Delta) | Delta |
| LC_743 | EPI ISL 4026631 | B.1.617.2 | 21A (Delta) | Delta |
| LC_744 | EPI ISL 5258008 | B.1.617.2 | 21A (Delta) | Delta |
| LC_745 | EPI ISL 5258009 | B.1.617.2 | 21A (Delta) | Delta |

|        |                 |           |             |       |
|--------|-----------------|-----------|-------------|-------|
| LC_746 | EPI ISL 5258010 | AY.25     | 21A (Delta) | Delta |
| LC_747 | EPI ISL 5258011 | B.1.617.2 | 21A (Delta) | Delta |
| LC_748 | EPI ISL 5258012 | AY.26     | 21A (Delta) | Delta |
| LC_749 | EPI ISL 5258013 | AY.20     | 21A (Delta) | Delta |
| LC_750 | EPI ISL 5258014 | B.1.617.2 | 21A (Delta) | Delta |
| LC_751 | EPI ISL 5258015 | B.1.617.2 | 21A (Delta) | Delta |
| LC_752 | EPI ISL 5258016 | B.1.617.2 | 21A (Delta) | Delta |
| LC_753 | EPI ISL 5258017 | B.1.617.2 | 21A (Delta) | Delta |
| LC_754 | EPI ISL 5258018 | AY.25     | 21A (Delta) | Delta |
| LC_755 | EPI ISL 5258019 | AY.26     | 21A (Delta) | Delta |
| LC_756 | EPI ISL 5258020 | AY.26     | 21A (Delta) | Delta |
| LC_757 | EPI ISL 5258021 | AY.3      | 21A (Delta) | Delta |
| LC_758 | EPI ISL 5258026 | AY.3      | 21A (Delta) | Delta |
| LC_759 | EPI ISL 5258027 | B.1.617.2 | 21A (Delta) | Delta |
| LC_760 | EPI ISL 5258028 | AY.25     | 21A (Delta) | Delta |
| LC_761 | EPI ISL 5258029 | AY.34     | 21A (Delta) | Delta |
| LC_762 | EPI ISL 5258030 | B.1.617.2 | 21A (Delta) | Delta |
| LC_763 | EPI ISL 5258031 | AY.3      | 21A (Delta) | Delta |
| LC_764 | EPI ISL 5258032 | B.1.617.2 | 21A (Delta) | Delta |
| LC_765 | EPI ISL 5258033 | B.1.617.2 | 21A (Delta) | Delta |
| LC_766 | EPI ISL 5258034 | AY.3      | 21A (Delta) | Delta |
| LC_767 | EPI ISL 5258035 | B.1.617.2 | 21A (Delta) | Delta |
| LC_768 | EPI ISL 5258036 | AY.25     | 21A (Delta) | Delta |
| LC_769 | EPI ISL 5258037 | AY.20     | 21A (Delta) | Delta |
| LC_770 | EPI ISL 5258038 | B.1.617.2 | 21A (Delta) | Delta |
| LC_771 | EPI ISL 5258039 | AY.3      | 21A (Delta) | Delta |
| LC_773 | EPI ISL 5258041 | AY.25     | 21A (Delta) | Delta |
| LC_774 | EPI ISL 5258042 | B.1.617.2 | 21A (Delta) | Delta |
| LC_775 | EPI ISL 5258043 | B.1.617.2 | 21A (Delta) | Delta |
| LC_776 | EPI ISL 5258044 | AY.26     | 21A (Delta) | Delta |
| LC_777 | EPI ISL 5258045 | B.1.617.2 | 21A (Delta) | Delta |
| LC_778 | EPI ISL 5258046 | AY.3      | 21A (Delta) | Delta |
| LC_779 | EPI ISL 5258047 | B.1.617.2 | 21A (Delta) | Delta |
| LC_780 | EPI ISL 5258048 | B.1.617.2 | 21A (Delta) | Delta |
| LC_781 | EPI ISL 5258049 | B.1.617.2 | 21A (Delta) | Delta |
| LC_782 | EPI ISL 5258050 | B.1.617.2 | 21A (Delta) | Delta |
| LC_783 | EPI ISL 5258051 | AY.3      | 21A (Delta) | Delta |
| LC_784 | EPI ISL 5258052 | B.1.617.2 | 21A (Delta) | Delta |
| LC_785 | EPI ISL 5258053 | B.1.617.2 | 21A (Delta) | Delta |



|        |                 |           |             |       |
|--------|-----------------|-----------|-------------|-------|
| LC_786 | EPI ISL 5258054 | AY.25     | 21A (Delta) | Delta |
| LC_787 | EPI ISL 5258055 | B.1.617.2 | 21A (Delta) | Delta |
| LC_788 | EPI ISL 5258056 | B.1.617.2 | 21A (Delta) | Delta |
| LC_789 | EPI ISL 5258057 | AY.3      | 21A (Delta) | Delta |
| LC_791 | EPI ISL 5258059 | B.1.617.2 | 21A (Delta) | Delta |
| LC_792 | EPI ISL 5258060 | B.1.617.2 | 21A (Delta) | Delta |
| LC_793 | EPI ISL 5258061 | B.1.617.2 | 21A (Delta) | Delta |

Based on the lineage of SARS-CoV-2 identified by WGS, children were grouped based on whether their COVID-19 infection was caused by a VOC, as well as the specific VOC lineage, using CDC definitions as of August 19<sup>th</sup>, 2021.<sup>2</sup>

**eTable 2: Medical conditions with high-risk of COVID-19 complications**

| Medical Condition                                             | Highest Level of Evidence              |
|---------------------------------------------------------------|----------------------------------------|
| Bronchiectasis                                                | Meta-Analysis and/or systematic review |
| Bronchopulmonary dysplasia                                    |                                        |
| Pulmonary hypertension and pulmonary embolism                 |                                        |
| Cancer                                                        |                                        |
| Cerebrovascular disease                                       |                                        |
| Chronic kidney disease                                        |                                        |
| Chronic liver disease                                         |                                        |
| COPD                                                          |                                        |
| Diabetes mellitus, type 1                                     |                                        |
| Diabetes mellitus, type 2                                     |                                        |
| Heart conditions                                              |                                        |
| Interstitial lung disease                                     |                                        |
| Smoking, current and former                                   |                                        |
| Tuberculosis                                                  |                                        |
| Obesity*                                                      |                                        |
| Pregnancy and Recent Pregnancy                                |                                        |
| Mental health disorders                                       | Observational study                    |
| Down syndrome                                                 |                                        |
| HIV                                                           |                                        |
| Neurologic conditions                                         |                                        |
| Overweight*                                                   |                                        |
| Sickle cell disease                                           |                                        |
| Solid organ or blood stem cell transplantation                |                                        |
| Substance use disorders                                       |                                        |
| Use of corticosteroids or other immunosuppressive medications |                                        |

Children in this study were classified as high risk for COVID-19 complications if they had an underlying condition for which there are high-quality and reproducible data (i.e., meta-analysis, systematic review, or observational study; excluding small studies, case reports/series, or conflicting evidence) based on CDC classification as of August 31<sup>st</sup>, 2021.<sup>3</sup>

\*Obesity identified as body mass index (BMI)  $\geq 30$  kg/m<sup>2</sup> (or  $\geq 95^{\text{th}}$ ile), and overweight defined as BMI 25-30 (or 85-95<sup>th</sup>ile). If height was unknown and BMI was undetermined, patient was identified as high risk if weight > 95<sup>th</sup>ile.

**eTable 3: COVID-19 World Health Organization Clinical Progression Scale<sup>4</sup>**

| Patient State                  | Descriptor                                                                                             | Score |
|--------------------------------|--------------------------------------------------------------------------------------------------------|-------|
| Uninfected                     | Uninfected; no viral RNA detected                                                                      | 0     |
| Ambulatory mild disease        | Asymptomatic; viral RNA detected                                                                       | 1     |
|                                | Symptomatic; independent                                                                               | 2     |
|                                | Symptomatic; assistance needed                                                                         | 3     |
| Hospitalized: moderate disease | Hospitalized; no oxygen therapy*                                                                       | 4     |
|                                | Hospitalized; oxygen by mask or nasal cannula                                                          | 5     |
| Hospitalized: severe disease   | Hospitalized; oxygen by non-invasive ventilation or high-flow nasal cannula                            | 6     |
|                                | Intubation and mechanical ventilation, $pO_2/FiO_2 \geq 150$ or $SpO_2/FiO_2 \geq 200$                 | 7     |
|                                | Mechanical ventilation $pO_2/FiO_2 < 150$ ( $SpO_2/FiO_2 < 200$ ) or vasopressors                      | 8     |
|                                | Mechanical ventilation $pO_2/FiO_2$ and vasopressors, dialysis, or extracorporeal membrane oxygenation | 9     |
| Dead                           | Dead                                                                                                   | 10    |

$pO_2$ : partial pressure of oxygen.  $FiO_2$ : fraction of inspired oxygen.  $SpO_2$ : oxygen saturation.

\*If hospitalized for reasons other than COVID-19, status recorded as for ambulatory patient.

**eTable 4: Sensitivity analysis<sup>^</sup> assessing association between COVID-19 severity and SARS-CoV-2 variants of concern correcting for potential impact of COVID-19 vaccine and monoclonal antibodies**

|                                                | Marker of COVID-19 Severity: Odds Ratio (95% Confidence Interval; <i>p</i> Value) |                                            |                                          |                                        |                                               |
|------------------------------------------------|-----------------------------------------------------------------------------------|--------------------------------------------|------------------------------------------|----------------------------------------|-----------------------------------------------|
|                                                | Hospitalized for COVID-19                                                         | COVID-19 Pharmacologic Treatment           | Respiratory Support                      | Intensive Care Unit Admission          | WHO Clinical Progression Scale Score $\geq 6$ |
| Age                                            | 1.02<br>(0.96-1.09; 0.5)                                                          | <b>1.2</b><br><b>(1.1-1.4; &lt;0.001)*</b> | <b>1.2</b><br><b>(1.1-1.3; 0.003)*</b>   | <b>1.2</b><br><b>(1.1-1.3; 0.003)*</b> | <b>1.2</b><br><b>(1.1-1.4; 0.003)*</b>        |
| Race (Black)                                   | 1.03<br>(0.36-2.7; >0.9)                                                          | 0.60<br>(0.15-2.1; 0.4)                    | 0.53<br>(0.11-2.1; 0.4)                  | 0.61<br>(0.12-2.4; 0.5)                | 0.7<br>(0.12-2.8; 0.6)                        |
| Ethnicity (Hispanic)                           | 1.3<br>(0.56-2.8; 0.6)                                                            | 0.43<br>(0.12-1.3; 0.2)                    | 0.44<br>(0.11-1.5; 0.2)                  | 0.45<br>(0.11-1.6; 0.2)                | 0.43<br>(0.08-1.7; 0.3)                       |
| High-risk condition for COVID-19 complications | <b>5.1</b><br><b>(2.4-12.0, &lt;0.001)*</b>                                       | -                                          | -                                        | -                                      | -                                             |
| Pediatric COVID-19 community incidence         | 1.0<br>(1.0-1.0; 0.6)                                                             | 1.0<br>(1.0-1.0; 0.2)                      | 1.0<br>(1.0-1.0; 0.8)                    | 1.0<br>(1.0-1.0; 0.2)                  | 1.0<br>(1.0-1.0; 0.7)                         |
| SARS-CoV-2 lineage                             |                                                                                   |                                            |                                          |                                        |                                               |
| <i>Non-VOC</i>                                 | ref                                                                               | ref                                        | ref                                      | Ref                                    | Ref                                           |
| <i>Alpha VOC</i>                               | 2.8<br>(0.95-8.4; 0.06)                                                           | 2.1<br>(0.5-9.4; 0.3)                      | 2.1<br>(0.34-12.9; 0.4)                  | 2.2<br>(0.43-11.9; 0.3)                | 2.8<br>(0.4-24.3; 0.3)                        |
| <i>Gamma VOC</i>                               | <b>6.5</b><br><b>(1.9-22.7; 0.003)*</b>                                           | 4.7<br>(0.97-23.2; 0.05)                   | <b>10.6</b><br><b>(2.2-65.0; 0.005)*</b> | 4.3<br>(0.72-26.1; 0.1)                | <b>11.2</b><br><b>(1.8-98.1; 0.013)*</b>      |
| <i>Delta VOC</i>                               | 2.5<br>(0.80-8.1; 0.12)                                                           | 2.3<br>(0.53-10.8; 0.3)                    | 3.1<br>(0.57-19.9; 0.2)                  | 2.2<br>(0.43-12.7; 0.3)                | 3.3<br>(0.46-31.0; 0.2)                       |

VOC- variant of concern. y- years. m- month. ref- reference group for VOC odds ratio calculations. N/A- not applicable. High-risk conditions were excluded from the model for some outcomes because having a high-risk condition was mutually inclusive with the outcome of interest.

<sup>^</sup>A small number of patients were fully vaccinated (n=2; one each in the gamma and delta VOC groups) at time of their breakthrough infection or had received SARS-CoV-2 monoclonal antibodies (n=3; all in the alpha VOC group) as an outpatient early in infection to prevent subsequent morbidity. A sensitivity analysis was performed whereby we repeated the models reported in Table 1, presuming that these five patients would have experienced each severity marker had they not received these therapies. \*Bolted values indicate statistical significance ( $p < 0.05$ ).

## Supplemental References

1. Grubaugh ND, Gangavarapu K, Quick J, et al. An amplicon-based sequencing framework for accurately measuring intrahost virus diversity using PrimalSeq and iVar. *Genome biology*. Jan 8 2019;20(1):8. doi:10.1186/s13059-018-1618-7
2. Centers for Disease Control and Prevention; SARS-CoV-2 Variant Classifications and Definitions. Accessed August 31st, 2021, <https://www.cdc.gov/coronavirus/2019-ncov/variants/variant-info.html>
3. Centers for Disease Control and Prevention; Science Brief: Evidence Used to Update the List of Underlying Medical Conditions Associated with Higher Risk for Severe COVID-19. Accessed August 31st, 2021, <https://www.cdc.gov/coronavirus/2019-ncov/science/science-briefs/underlying-evidence-table.html>
4. WHO Working Group on the Clinical Characterisation and Management of COVID-19 infection; A minimal common outcome measure set for COVID-19 clinical research. *Lancet Infect Dis*. Aug 2020;20(8):e192-e197. doi:10.1016/s1473-3099(20)30483-7
